# Supplementary material for: Objectively-Measured Neighbourhood Attributes as Correlates and Moderators of Quality of Life in Older Adults with Different Living Arrangements: The ALECS Cross-Sectional Study
Source: PubMed Central journal article supplement (PMC6427272; doi:10.3390/ijerph16050876), 2019-03-10
Supplement: ijerph-16-00876-s001.pdf [file ijerph-16-00876-s001.pdf]

## Supplementary Materials

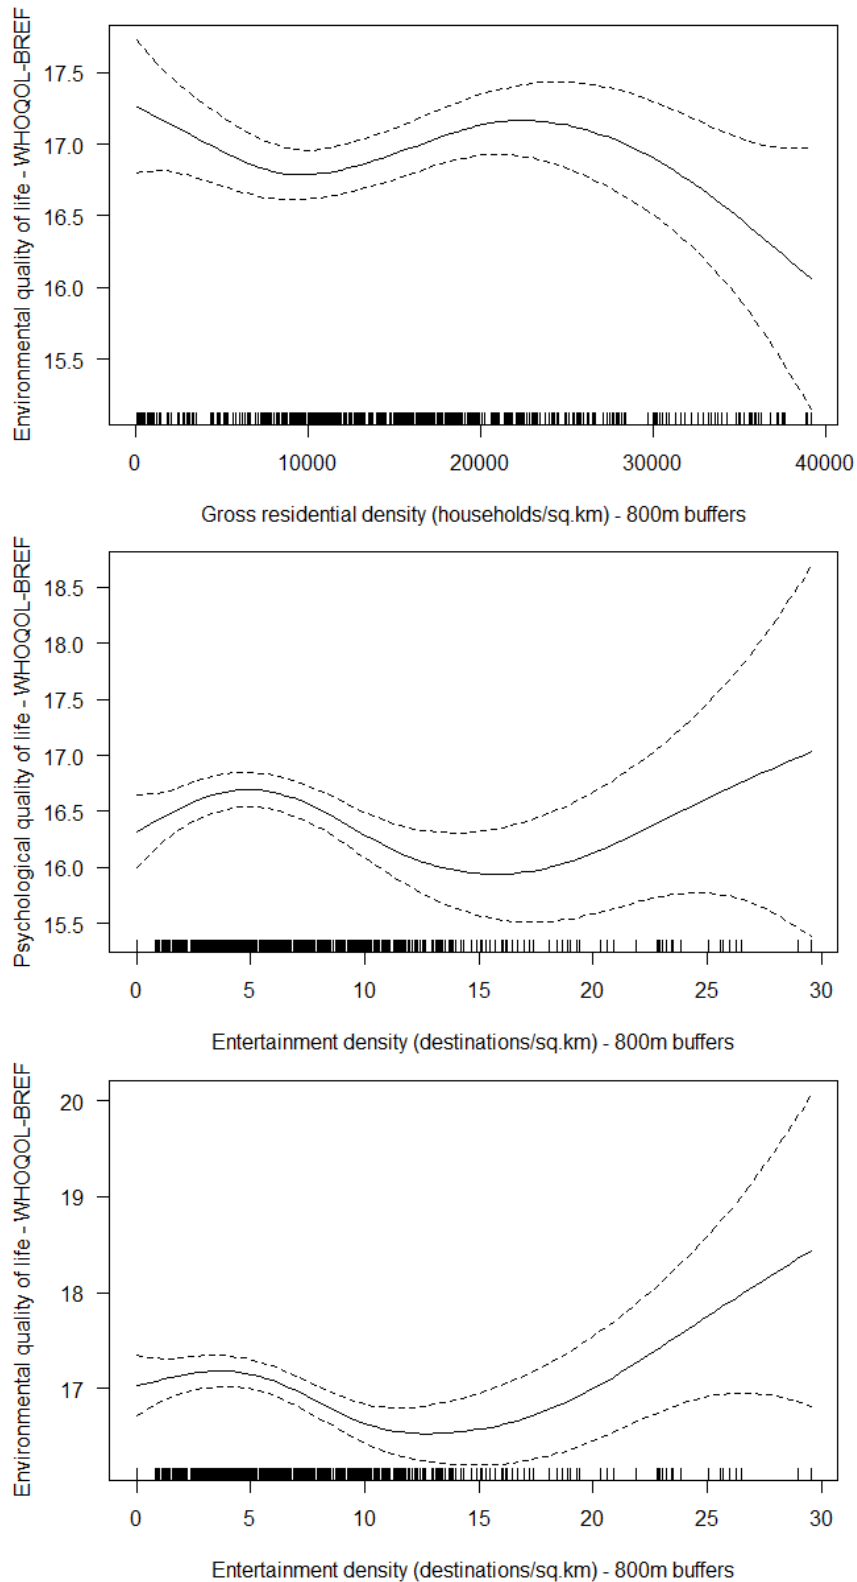

**Figure S1.** Curvilinear associations of single neighbourhood attributes with quality of life (QoL)—right top: association between gross residential density and environmental QoL; left bottom: association between entertainment density and psychological QoL; right bottom: association between entertainment density and environmental QoL. Notes: the solid lines represent point estimates (and dashed lines represent their 95% confidence intervals) of WHOQOL-BREF scores at various values of neighbourhood attributes.

**Table S1.** Definitions of environmental variables and expected associations with quality of life (QoL).

| Environmental Variable<br>(Data Source; Type of<br>Buffer Used)                      | Definition                                                                                                                                                                                                                                                                                                                                                                                                                                                      | Expected Associations with Quality of Life                                                                                                                                                                                                                                                                  |
|--------------------------------------------------------------------------------------|-----------------------------------------------------------------------------------------------------------------------------------------------------------------------------------------------------------------------------------------------------------------------------------------------------------------------------------------------------------------------------------------------------------------------------------------------------------------|-------------------------------------------------------------------------------------------------------------------------------------------------------------------------------------------------------------------------------------------------------------------------------------------------------------|
| Participant street-network residential buffer (extant GIS)                           | An irregularly shaped polygon around a participant's home address (geocoded) that approximates neighbourhood boundaries. Buffer polygons were created for two distances (400-m and 800-m) by tracing through unique street networks in all directions. We calculated the total land area (km <sup>2</sup> ) of each participant residential buffer. All GIS variables listed below were computed for each participant's 400 m and 800 m street-network buffers. | Not applicable                                                                                                                                                                                                                                                                                              |
| Gross residential density (extant GIS; 400 m and 800 m street-network buffers)       | Number of residential households divided by the area of the participant street-network residential buffers, expressed as households per km <sup>2</sup> .                                                                                                                                                                                                                                                                                                       | Positive or rotated J-shaped<br>Providing better access to destinations, more opportunities for physical activity [1] and social interactions [2] that are associated with better perceived QoL [3]. However, very high levels of density may act as stressors [4] which have a negative effect on QoL [5]. |
| Street intersection density (extant GIS; 400 m and 800 m street-network buffers)     | Number of three-and-more-way intersections divided by the area of the participant street-network residential buffers, expressed as intersections per km <sup>2</sup> .                                                                                                                                                                                                                                                                                          | Positive or rotated J-shaped<br>Providing better access to destinations, more opportunities for physical activity and social interactions that are associated with better perceived QoL. However, moderate-to-high levels of these                                                                          |
| Connectivity (EA; 400 m crow-fly buffer)                                             | Assessed by 2 items: no cul-de-sacs; bridge/overpass or tunnel. A participant's score on this variable represents the percentage of a street-segment's highest obtainable score (in this case, 2) averaged across audited street segments within a participant crow-fly residential buffer.                                                                                                                                                                     | attributes may be associated with higher traffic-related hazards and noise [6] which have been found to be negatively related to QoL [7].                                                                                                                                                                   |
| Civic and institutional density (extant GIS; 400 m and 800 m street-network buffers) | Number of civic and institutional locations (e.g., government office, public services, school) divided by the area of the participant street-network residential buffers, expressed as number of destinations per km <sup>2</sup> .                                                                                                                                                                                                                             | Positive<br>Access to civic/institutional destinations provides more opportunities for active transport [6] and social activities that are associated with better QoL [3,8].                                                                                                                                |
| Prevalence of non-food retail and services (EA; 400m crow-fly buffer)                | Sum of number of non-food retail and services types (post-office, hotel, warehouse, laundry, bank, hardware store, pharmacy, clothing/shoe store, book/stationary store and video/audio store) across all audited street segments within a participant's crow-fly residential buffer.                                                                                                                                                                           | Positive<br>Access to retail/commercial destinations provides more opportunities for active transport and social activities.                                                                                                                                                                                |
| Entertainment density (extant GIS; 400 m and 800m street-network buffers)            | Number of entertainment destinations (e.g., theatre, museum, community centre, art gallery) divided by the area of the participant street-network residential buffers, expressed as number of destinations per km <sup>2</sup> .                                                                                                                                                                                                                                | Positive<br>Access to entertainment destinations provides more opportunities for active transport and social and leisure activities that are associated with better perceived QoL [3,8,9].                                                                                                                  |

|                                                                         |                                                                                                                                                                                                                                                                                        |                                                                                                                                                                                                                                                                                                          |
|-------------------------------------------------------------------------|----------------------------------------------------------------------------------------------------------------------------------------------------------------------------------------------------------------------------------------------------------------------------------------|----------------------------------------------------------------------------------------------------------------------------------------------------------------------------------------------------------------------------------------------------------------------------------------------------------|
| Recreation density (extant GIS; 400 m and 800 m street-network buffers) | Number of recreational destinations (e.g., sports centre, swimming pool, fitness club) divided by the area of the participant street-network residential buffers, expressed as number of destinations per km <sup>2</sup> .                                                            | Positive<br>Access to recreational destinations provides more opportunities for active transport, leisure-time physical activity and social activities.                                                                                                                                                  |
| Prevalence of food-related shops (EA; 400 m crow-fly buffer)            | Sum of number of food-related shop types (convenience store, supermarket, fresh-food market and bakery/cake shop) across all audited street segments within a participant's crow-fly residential buffer.                                                                               | Positive<br>Access to food-related destinations provides more opportunities for active transport and social activities.                                                                                                                                                                                  |
| Prevalence of eating outlets (EA; 400 m crow-fly buffer)                | Sum of number of eating outlet types (chained fast-food restaurant, Chinese coffee/noodle shop, Chinese non-fast-food restaurant, Western non-fast-food restaurant and Western coffee shop) across all audited street segments within a participant's crow-fly residential buffer.     | Positive<br>Access to destinations where older adults can socialise and meet others provides more opportunities for active transport and social activities.                                                                                                                                              |
| Prevalence of destinations for socialising (EA; 400 m crow-fly buffer)  | Sum of number of destinations suitable for socialising (community/elderly centre, museum, HK Jockey Club betting branch, movie or theatre, hairdresser or barber, religious places and library) across all audited street segments within a participant's crow-fly residential buffer. | Positive<br>Access to health-related destinations provides more opportunities for active transport and social activities.                                                                                                                                                                                |
| Prevalence of health clinics/services (EA; 400m crow-fly buffer)        | Total number of health clinics/services in all audited street segments within a participant's crow-fly residential buffer.                                                                                                                                                             | Positive or rotated J-shaped<br>Providing better access to destinations, more opportunities for active transport and social interactions. However, high levels of public transport density may be associated with higher traffic-related noise and pollution and these have negative effects on QoL [9]. |
| Prevalence of public transport stops (EA; 400 m crow-fly buffer)        | Total number of public transport stops (bus stop, tram stop, MTR/train stop, ferry) in all audited street segments within a participant's crow-fly residential buffer.                                                                                                                 | Positive<br>Access to parks provides more opportunities for active transport, leisure-time physical activity and social and leisure activities.                                                                                                                                                          |
| Number of parks (EA; 400 m crow-fly buffer)                             | Number of public parks intersecting a participant's crow-fly residential buffer. A public park was defined as a government designed park of any size that was free of charge, open to the public and maintained by a governmental agency.                                              | Positive<br>Access to open space and good quality of parks provide more opportunities for active transport, leisure-time physical activity and social and leisure activities.                                                                                                                            |
| Park area (extant GIS; 400 m and 800 m street-network buffers)          | Total area (hectare) of public parks intersecting the participant street-network residential buffers.                                                                                                                                                                                  | Positive                                                                                                                                                                                                                                                                                                 |
| Activity types in park (EA; 400 m crow-fly buffer)                      | Total number of activity types across all public parks intersecting a participant's crow-fly residential buffer.                                                                                                                                                                       | Positive<br>Access to open space and good quality of parks provide more opportunities for active transport, leisure-time physical activity and social and leisure activities.                                                                                                                            |
| Amenities in park (EA; 400m crow-fly buffer)                            | Maximum number of amenities across all public parks intersecting a participant's crow-fly residential buffer. Amenities are assessed by 7 items: children's play equipment, seating facilities, dog litter bags, taps/water sources                                                    |                                                                                                                                                                                                                                                                                                          |

|                                                          |                                                                                                                                                                                                                                                                                                                                                                                                                                                                             |                                                                                                                                                                                                     |
|----------------------------------------------------------|-----------------------------------------------------------------------------------------------------------------------------------------------------------------------------------------------------------------------------------------------------------------------------------------------------------------------------------------------------------------------------------------------------------------------------------------------------------------------------|-----------------------------------------------------------------------------------------------------------------------------------------------------------------------------------------------------|
|                                                          | for dogs, drinking fountains, parking facilities, and public transport. The maximum possible score is 7.                                                                                                                                                                                                                                                                                                                                                                    |                                                                                                                                                                                                     |
| Trees in park (EA; 400 m crow-fly buffer)                | Maximum score of tree scale across all public parks intersecting a participant's crow-fly residential buffer. Tree scale assesses the tree placement at all perimeter sides and within parks, with higher scores indicating wider tree pattern. The maximum possible score is 5.                                                                                                                                                                                            |                                                                                                                                                                                                     |
| Paths in park (EA; 400 m crow-fly buffer)                | Maximum score of path scale all across public parks intersecting a participant's crow-fly residential buffer. Path scale assesses the path placement in terms of perimeter sides and diagonal or radial shapes across a park, with higher scores indicating wider path pattern. The maximum possible score is 7.                                                                                                                                                            |                                                                                                                                                                                                     |
| Park aesthetics (EA; 400 m crow-fly buffer)              | Maximum score of aesthetics across all public parks intersecting a participant's crow-fly residential buffer. Aesthetics is assessed by 3 items: watered grass, no graffiti, and no vandalism. The maximum possible score is 3.                                                                                                                                                                                                                                             |                                                                                                                                                                                                     |
| Park visibility (EA; parks within 400 m crow-fly buffer) | Maximum score of visibility across all public parks intersecting a participant's crow-fly residential buffer. Visibility from both surrounding roads and surrounding buildings/houses are assessed. Three levels are used: clearly seen, partly seen, and cannot be seen. The maximum possible score is 8.                                                                                                                                                                  |                                                                                                                                                                                                     |
| Pedestrian infrastructure (EA; 400 m crow-fly buffer)    | Assessed by 7 items: no steep roads/hilly street, footpaths present, footpaths well-maintained, no wet and slippery streets, bridge/overpass or tunnel, no major barriers to walking, and presence of indoor air-conditioned areas for walking. A participant's score on this variable represents the percentage of a street-segment's highest obtainable score (in this case, 7) averaged across audited street segments within a participant crow-fly residential buffer. | Positive<br>Providing better access to destinations, more opportunities for active transport and social interactions.                                                                               |
| Sitting facilities (EA; 400 m crow-fly buffer)           | Assessed by a single item: benches/places for sitting. This variable represents the percentage of street-segments within a participant crow-fly residential buffer that have sitting facilities.                                                                                                                                                                                                                                                                            | Positive<br>Providing a place to rest outdoors and socialise with others.                                                                                                                           |
| Crowdedness (EA; 400 m crow-fly buffer)                  | Assessed by 3 items: street crowded, motor vehicles parked on the footpaths, and hawkers and shops on streets. A participant's score on this variable represents the percentage of a street-segment's highest obtainable score (in this case, 3) averaged across audited street segments within a participant crow-fly residential buffer.                                                                                                                                  | Positive or rotated J-shaped<br>Providing opportunities for active transport and social interactions. However, high levels of crowdedness may be associated with higher levels of noise and stress. |
| Presence of people (EA; 400 m crow-fly buffer)           | Assessed by 4 items: presence of adults or teenagers, elders, children, and people talking and greeting each other. A participant's score on this variable represents the percentage of a street-segment's highest obtainable score (in this case, 4) averaged across audited street segments within a participant crow-fly residential buffer.                                                                                                                             | Positive<br>Providing opportunities for social interactions.                                                                                                                                        |

|                                                     |                                                                                                                                                                                                                                                                                                                                                                                                                                                                         |                                                                                                                                                                     |
|-----------------------------------------------------|-------------------------------------------------------------------------------------------------------------------------------------------------------------------------------------------------------------------------------------------------------------------------------------------------------------------------------------------------------------------------------------------------------------------------------------------------------------------------|---------------------------------------------------------------------------------------------------------------------------------------------------------------------|
| Traffic safety (EA; 400 m crow-fly buffer)          | Assessed by 5 items: dirt/grass strip separating traffic from footpath, no aggressive drivers, street crossing aids, no parked cars blocking view of incoming traffic, and traffic calming devices (stop light, traffic island, crosswalk). A participant's score on this variable represents the percentage of a street-segment's highest obtainable score (in this case, 5) averaged across audited street segments within a participant crow-fly residential buffer. | Positive<br>Providing a safe environment for walking for transport and recreation.                                                                                  |
| Greenery/natural sights (EA; 400 m crow-fly buffer) | Assessed by 2 items: trees along street segment, and attractive natural sights. A participant's score on this variable represents the percentage of a street-segment's highest obtainable score (in this case, 2) averaged across audited street segments within a participant crow-fly residential buffer.                                                                                                                                                             | Positive<br>Exposure to greenery and aesthetically-pleasing sceneries may improve life satisfaction [10] by promoting engagement of physical and social activities. |
| Signs of crime/disorder (EA; 400 m crow-fly buffer) | Assessed by 5 items: people fighting, homeless people, prostitutes, needles/syringes, and graffiti. A participant's score on this variable represents the percentage of a street-segment's highest obtainable score (in this case, 5) averaged across audited street segments within a participant crow-fly residential buffer.                                                                                                                                         | Negative<br>Increase feelings of threat and act as deterrents to walking and spending time outdoors.                                                                |
| Stray dogs/animals (EA; 400 m crow-fly buffer)      | Assessed by a single item: presence of stray dogs/animals. This variable represents the percentage of street-segments within a participant crow-fly residential buffer where stray dogs/animals were observed.                                                                                                                                                                                                                                                          | Negative<br>Increase feelings of threat and act as deterrents to walking and spending time outdoors.                                                                |
| Litter/decay (EA; 400 m crow-fly buffer)            | Assessed by 5 items: litter, broken bottles and cans, dog/animal fouling, no attractive buildings, and abandoned/vacant buildings. A participant's score on this variable represents the percentage of a street-segment's highest obtainable score (in this case, 5) averaged across audited street segments within a participant crow-fly residential buffer.                                                                                                          | Negative<br>Increase feelings of threat and act as deterrents to walking and spending time outdoors.                                                                |
| Pollution (EA; 400 m crow-fly buffer)               | Assessed by 2 items: noise pollution, and unpleasant odour. A participant's score on this variable represents the percentage of a street-segment's highest obtainable score (in this case, 2) averaged across audited street segments within a participant crow-fly residential buffer.                                                                                                                                                                                 | Negative<br>Acts as a deterrent to walking and spending time outdoors and decrease perceived QoL [7].                                                               |

Notes: GIS = geographic information systems; EA = environmental audits.

## References

1. Sallis JF, Cerin E, Conway TL, et al. Physical activity in relation to urban environments in 14 cities worldwide: A cross-sectional study. *Lancet* 2016, 387, 2207–17.
2. Zhu X, Yu CY, Lee C, et al. A retrospective study on changes in residents' physical activities, social interactions, and neighborhood cohesion after moving to a walkable community. *Prev. Med.* 2014, 69 Suppl 1, S93–7.
3. Gouveia ERQ, Gouveia BR, Ihle A, et al. Correlates of health-related quality of life in young-old and old-old community-dwelling older adults. *Qual Life Res.* 2017, 26, 1561–9.
4. Fleming I, Baum A, Weiss L. Social density and perceived control as mediators of crowding stress in high-density residential neighborhoods. *J Pers Soc Psychol.* 1987, 52, 899–906.



|                                             |                            |        |                            |        |                          |       |                           |       |   |
|---------------------------------------------|----------------------------|--------|----------------------------|--------|--------------------------|-------|---------------------------|-------|---|
| Low <sup>†</sup>                            | -                          | -      | -                          | -      | -                        | -     | -                         | -     | - |
| High                                        | 0.019 (-0.355, 0.394)      | 0.919  | -0.082 (-0.368, 0.204)     | 0.575  | -0.082 (-0.367, 0.203)   | 0.573 | 0.112 (-0.216, 0.439)     | 0.504 |   |
| Recruitment area                            |                            |        |                            |        |                          |       |                           |       |   |
| Community centre <sup>†</sup>               | -                          | -      | -                          | -      | -                        | -     | -                         | -     | - |
| Elderly health centre                       | -0.045 (-0.459, 0.369)     | 0.830  | -0.182 (-0.520, 0.157)     | 0.292  | -0.205 (-0.540, 0.130)   | 0.230 | -0.562 (-0.919, -0.205)** | 0.002 |   |
| Number of current diagnosed health problems | -0.329 (-0.409, -0.294)*** | <0.001 | -0.177 (-0.249, -0.104)*** | <0.001 | -0.072 (-0.143, -0.002)* | 0.045 | -0.033 (-0.101, 0.035)    | 0.338 |   |

Notes: b = regression coefficient; CI = confidence interval; p = p value; - = not applicable. † reference group. \* p < 0.05; \*\* p < 0.01; \*\*\* p < 0.001.

**Table S3.** Associations between single GIS neighbourhood environmental attributes based on 400 m street-network buffers and quality of life (QoL) domains.

| Environmental Attributes        | (Unit)                               | Physical QoL           |       | Psychological QoL      |       | Social QoL             |       | Environmental QoL        |       |
|---------------------------------|--------------------------------------|------------------------|-------|------------------------|-------|------------------------|-------|--------------------------|-------|
|                                 |                                      | b (95% CI)             | p     | b (95% CI)             | p     | b (95% CI)             | p     | b (95% CI)               | p     |
| Gross residential density       | (1000 households/km <sup>2</sup> )   | -0.009 (-0.025, 0.007) | 0.262 | 0.006 (-0.007, 0.018)  | 0.396 | -0.005 (-0.018, 0.008) | 0.443 | -0.008 (-0.022, 0.006)   | 0.248 |
| Street intersection density     | (100 intersections/km <sup>2</sup> ) | 0.089 (-0.197, 0.374)  | 0.542 | -0.208 (-0.451, 0.034) | 0.093 | -0.132 (-0.370, 0.105) | 0.274 | -0.277 (-0.517, -0.037)* | 0.024 |
| Civic and institutional density | (destinations/km <sup>2</sup> )      | -0.001(-0.004, 0.002)  | 0.585 | -0.000 (-0.003, 0.002) | 0.861 | -0.001 (-0.004, 0.001) | 0.312 | -0.001 (-0.004, 0.002)   | 0.445 |
| Entertainment density           | (destinations/km <sup>2</sup> )      | 0.001(-0.010, 0.011)   | 0.907 | 0.001(-0.007, 0.010)   | 0.786 | -0.006 (-0.014, 0.003) | 0.181 | -0.007 (-0.016, 0.002)   | 0.132 |
| Recreation density              | (destinations/km <sup>2</sup> )      | -0.001 (-0.007, 0.006) | 0.879 | 0.001 (-0.005, 0.007)  | 0.762 | 0.005 (-0.001, 0.010)  | 0.128 | 0.003 (-0.002, 0.009)    | 0.255 |
| Park area                       | (hectares)                           | -0.013 (-0.029, 0.003) | 0.112 | 0.004 (-0.010, 0.018)  | 0.627 | -0.008 (-0.022, 0.007) | 0.305 | -0.001 (-0.015, 0.013)   | 0.882 |

Notes: b = regression coefficient; CI = confidence interval; p = p value; - = not applicable; GIS = geographic information systems; All estimates adjusted for age, sex, educational attainment, household with car, marital status, housing type, living arrangement, area-level socio-economic status, type of recruitment centre, and number of current diagnosed health problems. "0.000" occurs due to rounding and does not equal to zero. \* p < 0.05.
